# Supplementary material for: Kynurenic Acid and Its Analog SZR104 Exhibit Strong Antiinflammatory Effects and Alter the Intracellular Distribution and Methylation Patterns of H3 Histones in Immunochallenged Microglia-Enriched Cultures of Newborn Rat Brains
Source: MDPI journal article supplement (doi:10.3390/ijms23031079), 2022-01-19
Supplement: s1 [file s1]

**Table S1.** Molecular structure, chemical name, empirical formula and molecular weight of KYNA and its analog SZR104.

| Abbreviation | Molecular structure                                                               | Chemical name                                                                            | Empirical formula and molecular weight |
|--------------|-----------------------------------------------------------------------------------|------------------------------------------------------------------------------------------|----------------------------------------|
| KYNA         | 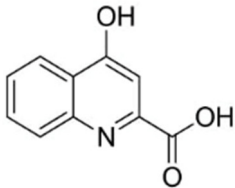 | 4-hydroxyquinolin-2-carboxylic acid                                                      | $C_{10}H_7NO_3$<br><br>189.17          |
| SZR104       |  | <i>N</i> -(2-(dimethylamino)ethyl)-3-(morpholinomethyl)-4-hydroxyquinoline-2-carboxamide | $C_{19}H_{26}N_4O_3$<br><br>358.43     |
