# Supplementary material for: Kynurenic Acid and Its Analog SZR104 Exhibit Strong Antiinflammatory Effects and Alter the Intracellular Distribution and Methylation Patterns of H3 Histones in Immunochallenged Microglia-Enriched Cultures of Newborn Rat Brains
Source: MDPI journal article supplement (doi:10.3390/ijms23031079), 2022-01-19
Supplement: s1 [file s1]

**Table S2.** Primary and secondary antibodies used in western blots and immunocytochemistry.

| Primary antibody, abbreviated name | Primary antibody, full name                                  | Final dilution (for ICC or WB) | Company                          | Secondary antibody with fluorochrome, full name                                          | Final dilution (for ICC or WB) | Company                                                                                             |
|------------------------------------|--------------------------------------------------------------|--------------------------------|----------------------------------|------------------------------------------------------------------------------------------|--------------------------------|-----------------------------------------------------------------------------------------------------|
| CD11b/c                            | Mouse anti-CD11b+CD11c ab.                                   | 1/500 (ICC)                    | Abcam, Cambridge, England        | Alexa Fluor 568 goat anti-mouse (ICC)                                                    | 1/1000 (ICC)                   | Invitrogen, Thermo Fisher Scientific Carlsbad, CA, USA                                              |
| CXCL10                             | Rabbit anti- C-X-C motif chemokine ligand 10 polycl. ab.     | 1/200 (ICC)                    | Biorbyt, Cambridge, UK           | Alexa Fluor 488 goat anti-rabbit (ICC)                                                   | 1/1000 (ICC)                   | Invitrogen, Thermo Fisher Scientific Carlsbad, CA, USA                                              |
| CCR1                               | Rabbit anti-CCR1 polycl. ab.                                 | 1/200 (ICC); 1/250 (WB)        | Novus, Centennial, CO, USA       | Alexa Fluor 488 goat anti-rabbit (ICC); horseradish peroxidase goat anti-rabbit ab. (WB) | 1/1000 (ICC); 1/2000 (WB)      | Invitrogen, Thermo Fisher Scientific Carlsbad, CA, USA (ICC); Sigma-Aldrich, Budapest, Hungary (WB) |
| H3                                 | Rabbit anti-Histone H3 polycl. ab.                           | 1/500 (ICC); 1/1500 (WB)       | Abcam, Cambridge, England        | Alexa Fluor 488 goat anti-rabbit (ICC); horseradish peroxidase goat anti-rabbit ab. (WB) | 1/1500 (ICC); 1/2000 (WB)      | Invitrogen, Thermo Fisher Scientific Carlsbad, CA, USA (ICC); Sigma-Aldrich, Budapest, Hungary (WB) |
| H3K9me3                            | Rabbit anti-Histone H3 (trimethyl K9) polycl. ab.            | 1/500 (ICC)                    | Abcam, Cambridge, England        | Alexa Fluor 488 goat anti-rabbit (ICC)                                                   | 1/1000 (ICC)                   | Invitrogen, Thermo Fisher Scientific Carlsbad, CA, USA                                              |
| H3K36me2                           | Rabbit anti-Histone H3 (dimethyl K36) monoclon. ab.          | 1/500 (ICC)                    | Abcam, Cambridge, England        | Alexa Fluor 488 goat anti-rabbit (ICC)                                                   | 1/1000 (ICC)                   | Invitrogen, Thermo Fisher Scientific Carlsbad, CA, USA                                              |
| GAPDH                              | Mouse anti-glyceraldehyde 3-phosphate dehydrogenase antibody | 1/20000 (WB)                   | Sigma Aldrich, Budapest, Hungary | Horseradish peroxidase rabbit anti-mouse (WB)                                            | 1/2000 (WB)                    | Sigma-Aldrich, Budapest, Hungary                                                                    |

ICC: immunocytochemistry, WB: Western blot.
